# Supplementary material
Source: Springer Nature journal article supplement (https://www.springermedizin.de/resource/supplementary/12957_2006_240_MOESM4_ESM.pdf/9564484)

**A.**

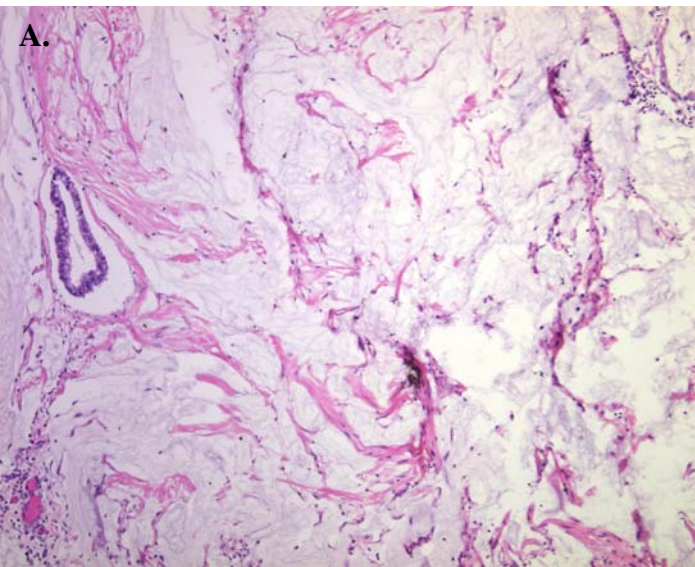

**B.**

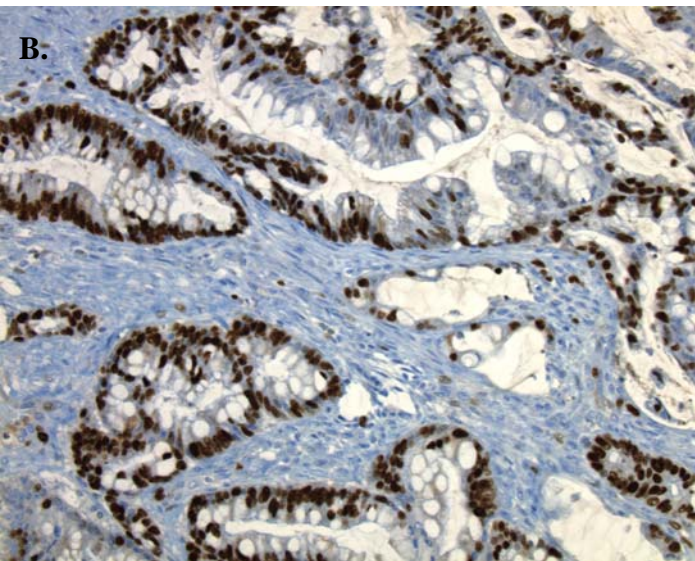

Supplement: MOESM4 [file 9564484]
